# Supplementary material for: Multi-layered graphene quantum dots derived photodegradation mechanism of methylene blue
Source: Royal Society of Chemistry journal article supplement (doi:10.1039/c5ra07310c), 2015-01-01
Supplement: c5ra07310c1.pdf [file c5ra07310c1.pdf]

**Multi-layered Graphene Quantum Dots derived Photodegradation mechanism of  
Methylene Blue**

*Sima Umrao<sup>†</sup>, Poornima Sharma<sup>†</sup>, Anushka Bansal<sup>‡</sup>, Ranjna Sinha<sup>‡</sup>, Ranjan Kumar Singh<sup>†</sup>,  
Anchal Srivastva<sup>†</sup>*

<sup>†</sup>Department of Physics, Banaras Hindu University, Varanasi-221005, India.

<sup>‡</sup> Department of Metallurgical Engineering, Indian Institute of Technology-B. H. U., Varanasi,  
221005, India

<sup>‡</sup>National Bureau of Fish Genetic Resources, Lucknow, India

**\* Corresponding author**

Phone: (+091) 542 2307 308, e-mail: [anchalbhu@gmail.com](mailto:anchalbhu@gmail.com)

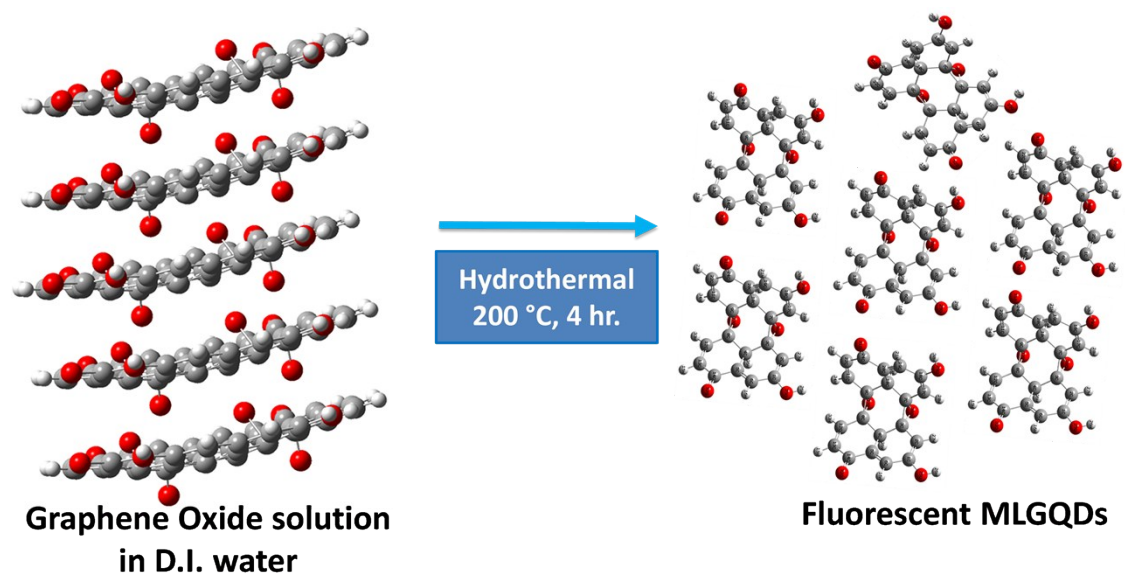

**Figure S 1.** Schematic for synthesis of MLGQDs by hydrothermal disintegration of GO

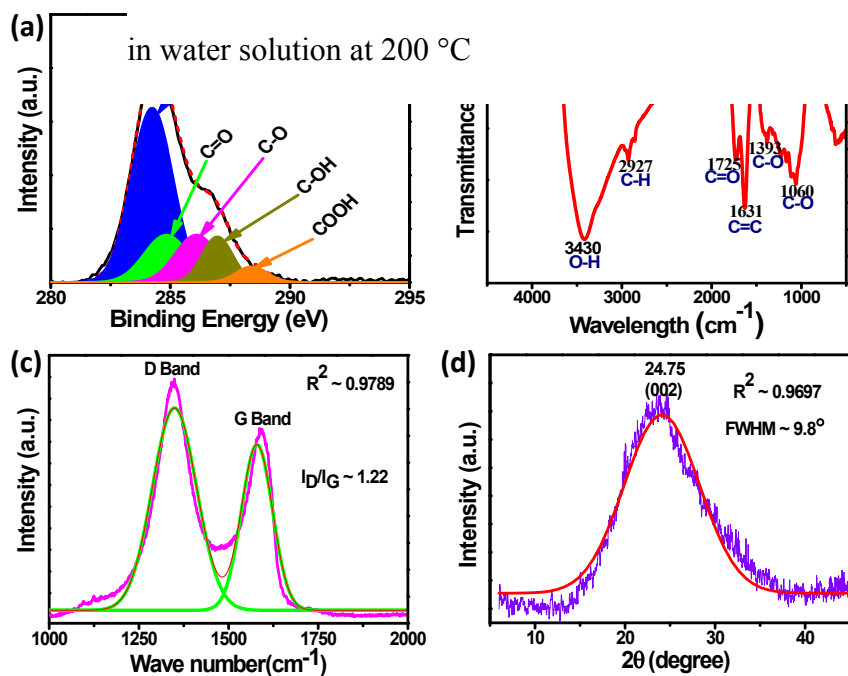

**Figure S 2.** (a) XPS spectra of MLGQDs, (b) FTIR spectra of MLGQDs, (c) Raman spectrum of MLGQDs, and (d) X-ray diffraction pattern of the MLGQDs.

**AC impedance Spectrum:**

To study about the separation of electrons and holes, the AC impedance measurement of ITO and MLGQDs electrodes in PBS solution (pH 7) containing 5 mM of  $[\text{Fe}(\text{CN})_6]^{3-/4-}$  was done using three electrode system with Ag/AgCl as reference, platinum as counter and MLGQDs/ITO as working electrode at the frequency range varying from 0.01 Hz to 10 kHz as shown in **Figure S2** (see in supplementary information). The values of charge transfer resistance ( $R_{\text{CT}}$ ) were recorded 133.5 ohm at open circuit voltage. A single semicircle at the high frequency region and a straight line at the low frequency region indicate a mixed charge transfer and charge diffusion process.<sup>S1</sup> The  $R_{\text{CT}}$  values of the MLGQDs electrode was much smaller than that of the ITO electrode, which illustrates that MLGQDs lead to a much lower charge transport resistance and much higher separation efficiency of electrons and holes. The high separations of charge promote the enhancement of photocatalytic activity of MLGQDs.

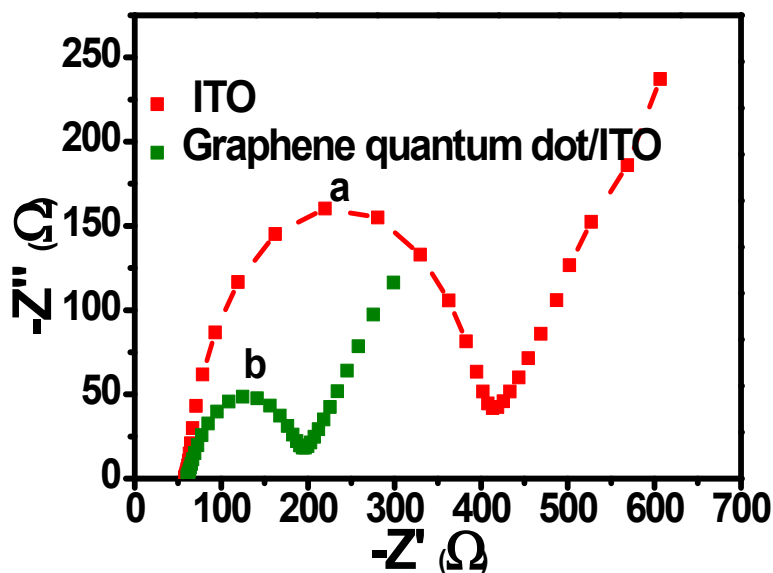

**Figure S 3.** AC impedance Spectra of as synthesized MLGQDs, the EIS measurements were performed in the presence of a PBS solution (pH 7) containing 5 mM  $[\text{Fe}(\text{CN})_6]^{3-/4-}$ .

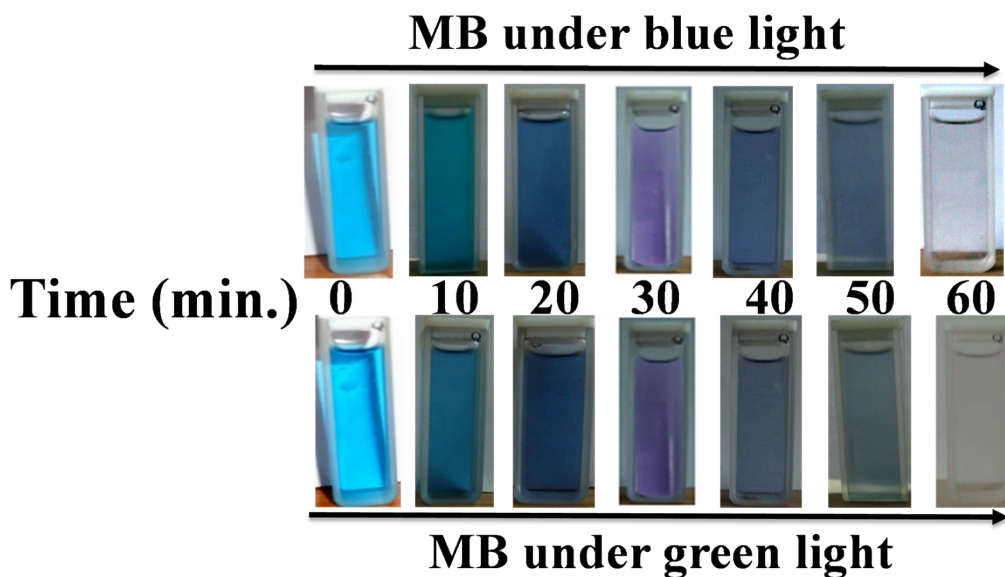

**Figure S 4.** Photographic image of MLGQDs-MB mixture before and after light exposure shows the color change from blue into colorless during the photodegradation of MB.

**Time dependent absorbance spectrum of MB under Green and Blue light:**

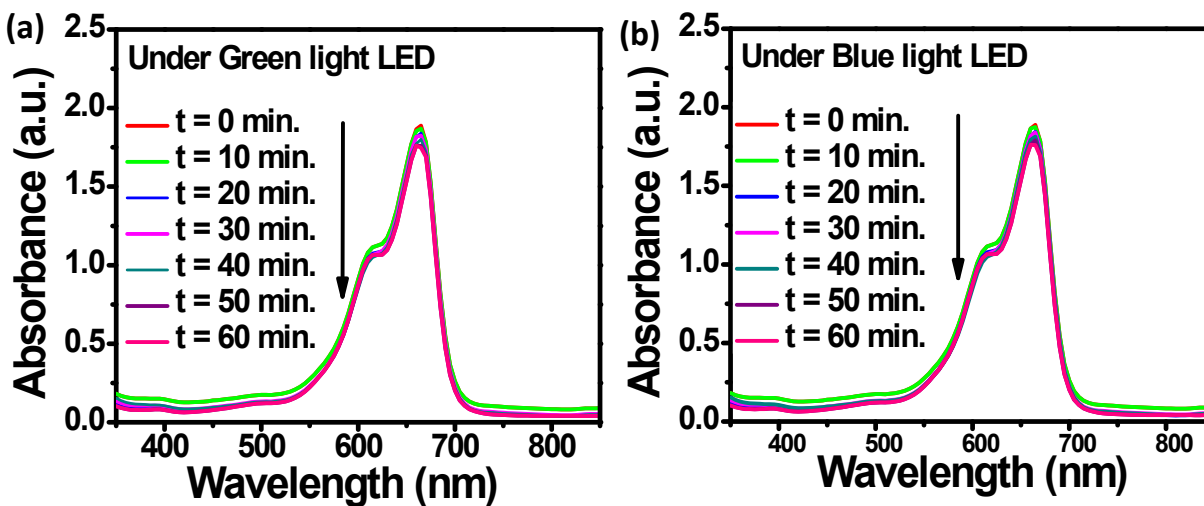

**Figure S5.** Time dependent absorbance of MB under green light (a) and blue light (b).

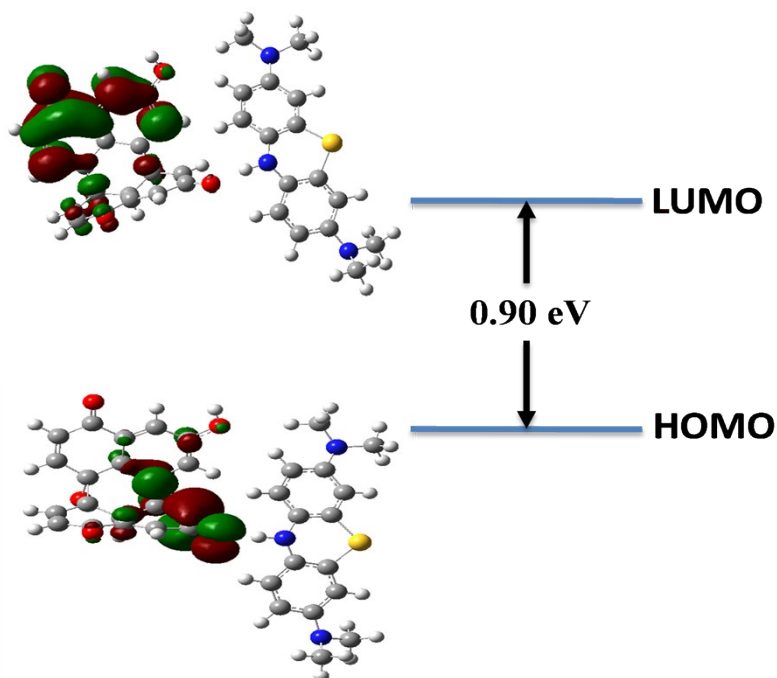

**Figure S 6.** Chemical structures and distribution of HOMO and LUMO for MLGQDs-MB complex in first energy band where minimal charge transfer within MLGQDs.

**Optimize structure of MLGQDs:**

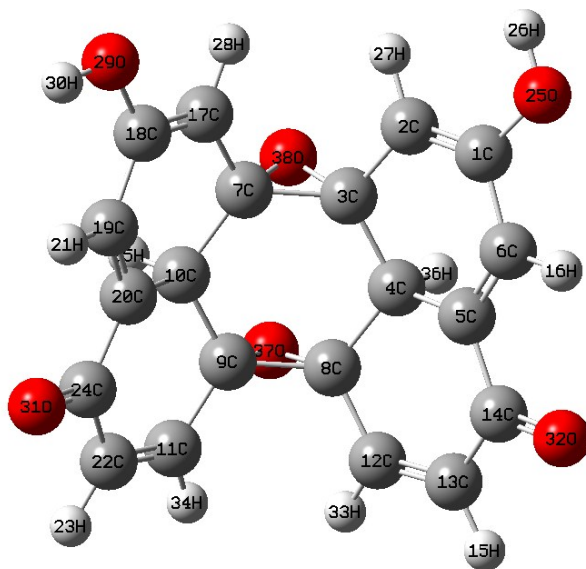

Optimize spectrum of MB:

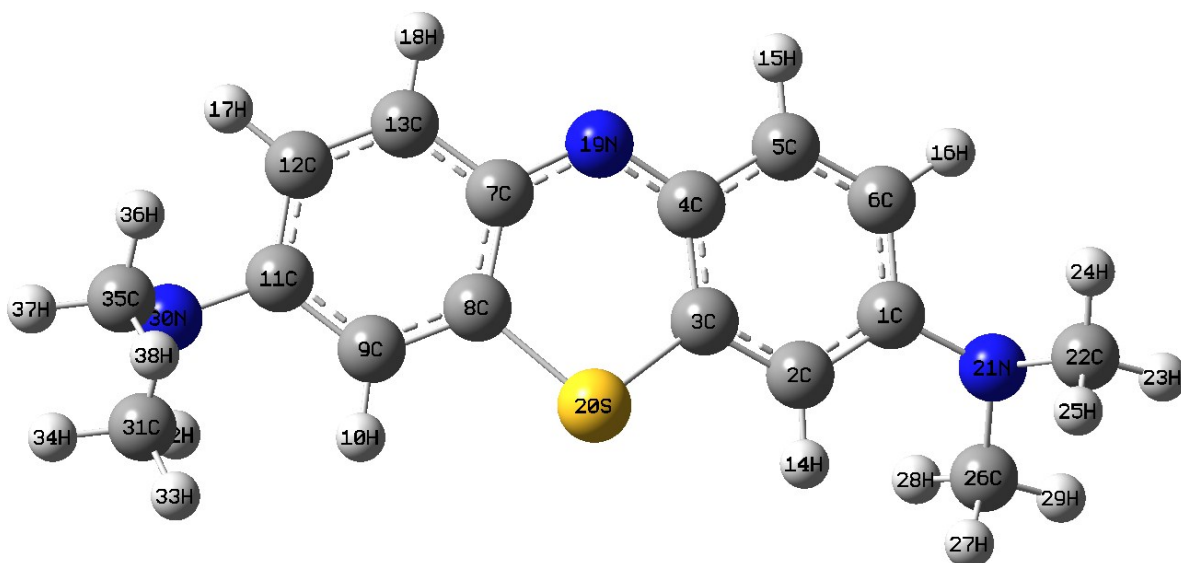

Optimize structure of LMB:

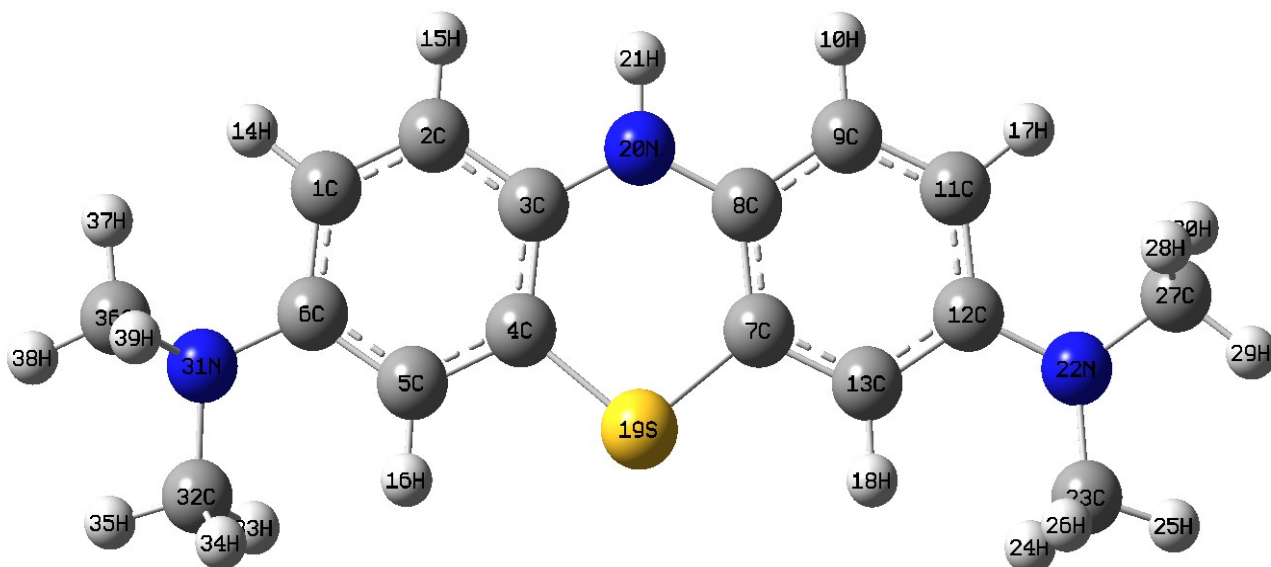

S1. Y. Liu, D.-P. Wang, Y.-X. Yu and W.-D. Zhang, *Int. J. Hydrogen Energy*, 2012, **37**, 9566–9575.
